# Supplementary material
Source: PubMed Central journal article supplement (PMC4526349)
Supplement: NIHMS652486-supplement-1.pdf [file NIHMS652486-supplement-1.pdf]

Supplemental Figure 1

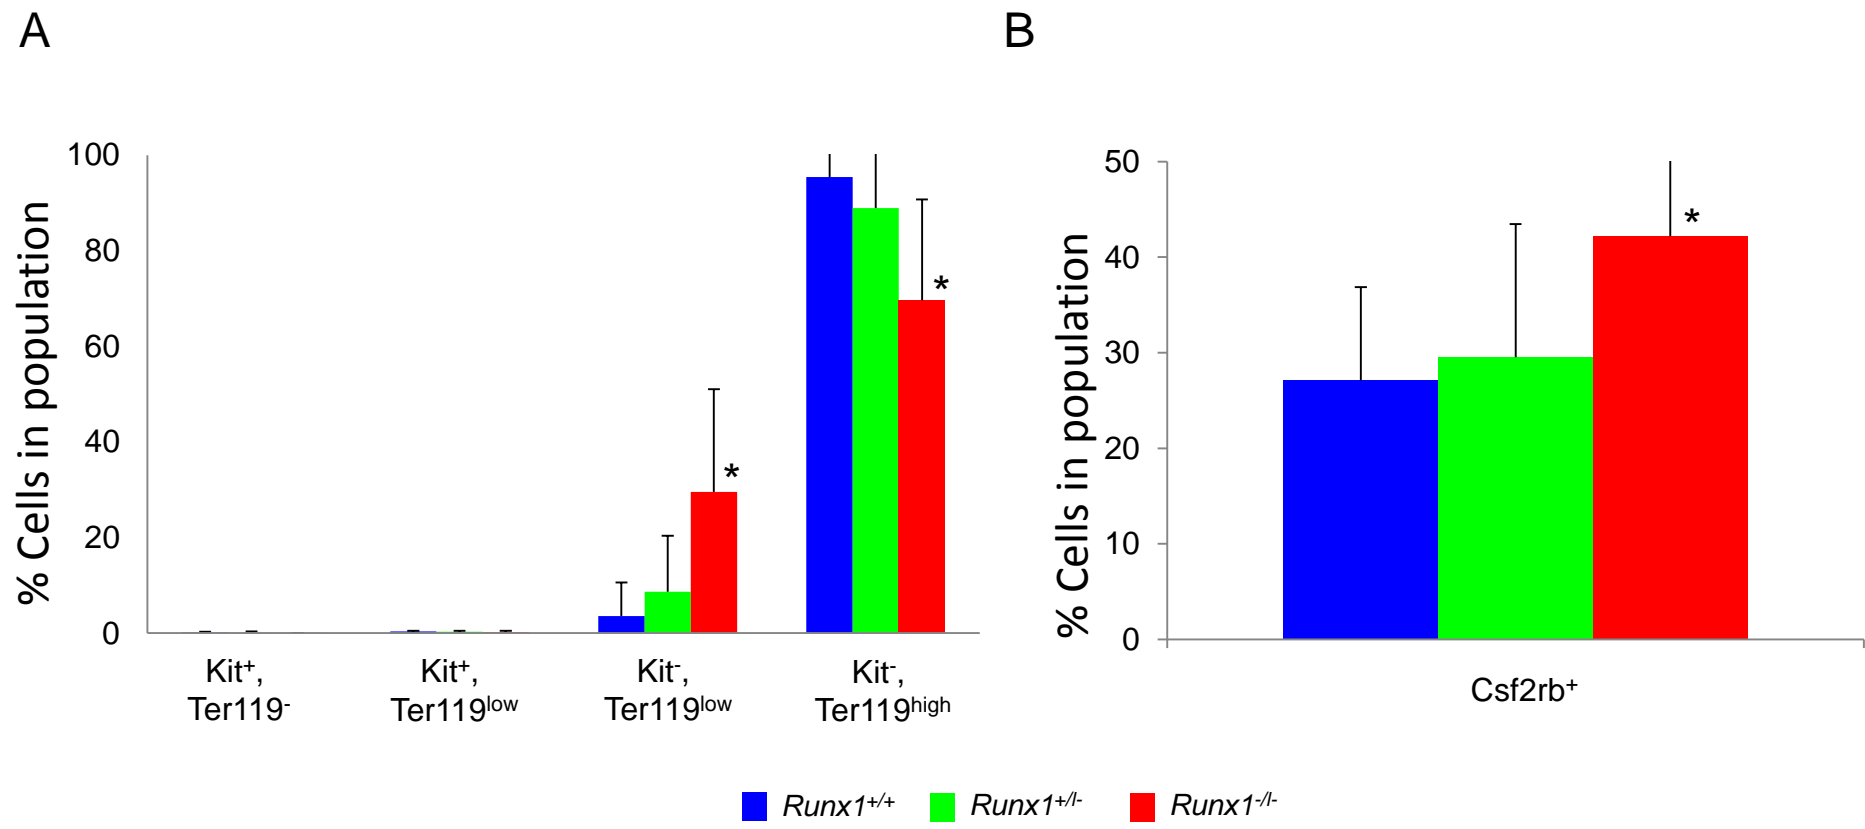

**Supplemental Figure 1. Differentiation defect in the primitive blood of *Runx1*<sup>-/-</sup>, but not *Runx1*<sup>+/-</sup> embryos.** Bar graphs of (A) Ter119 and Kit and (B) Csf2rb staining of primitive blood cells from E10.5 embryos of the indicated genotypes. \* indicates a statistically significant difference as compared to both *Runx1*<sup>+/+</sup> and *Runx1*<sup>+/-</sup> embryos. N≥3 for all genotypes.
