# Supplementary material
Source: PubMed Central journal article supplement (PMC4526349)
Supplement: NIHMS652486-supplement-4.pdf [file NIHMS652486-supplement-4.pdf]

# Supplemental Figure 4

**A**

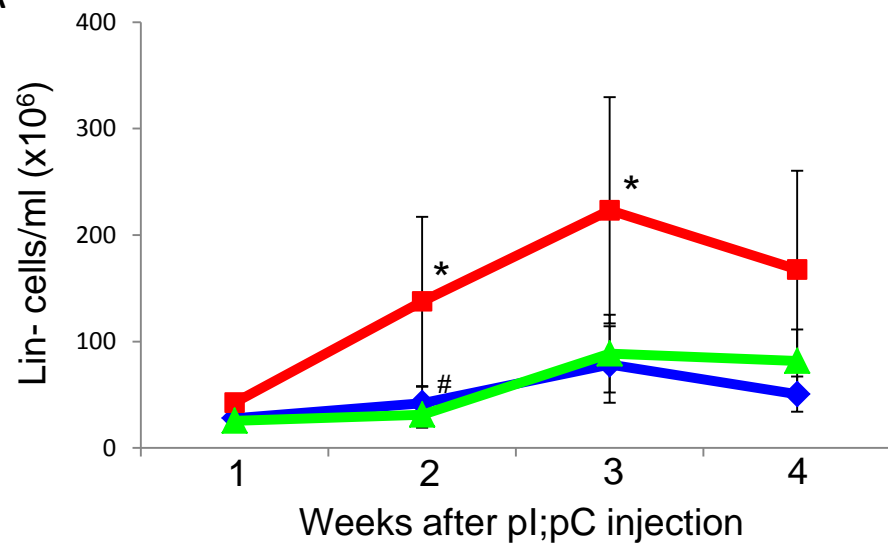

**B**

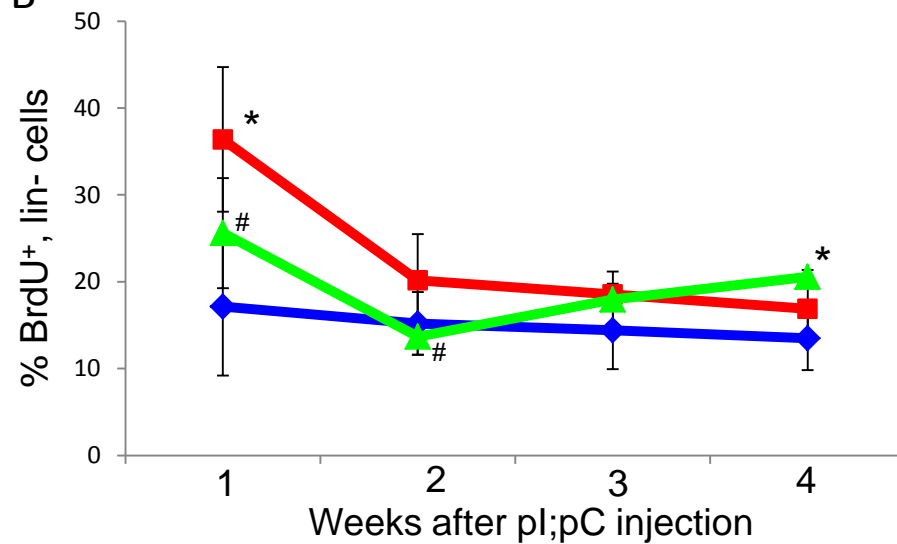

**C**

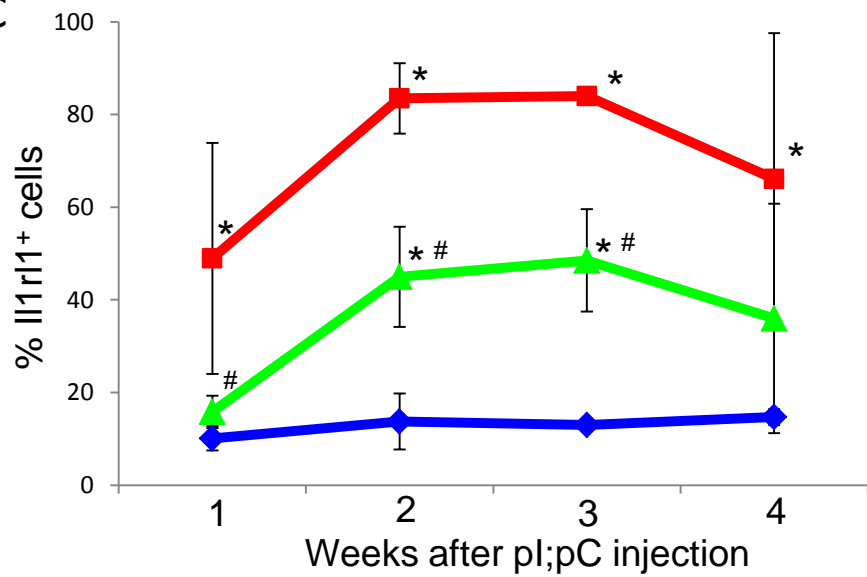

**D**

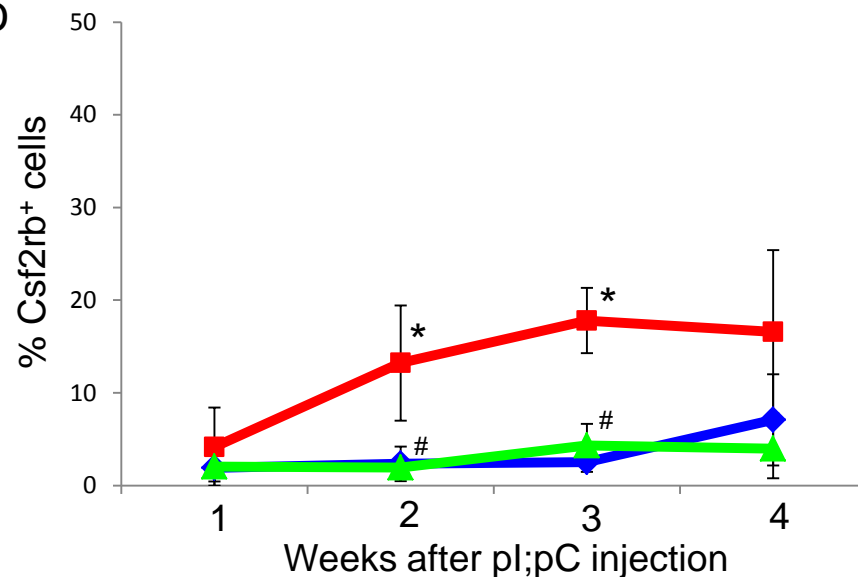

◆ *Runx1*<sup>+/+</sup>   
 ■ *Mx1-Cre*<sup>+</sup>, *Cbfb*<sup>+I56M</sup>, *Runx1*<sup>+/+</sup>   
 ▲ *Mx1-Cre*<sup>+</sup>, *Cbfb*<sup>+I56M</sup>, *Runx1*<sup>+/-</sup>

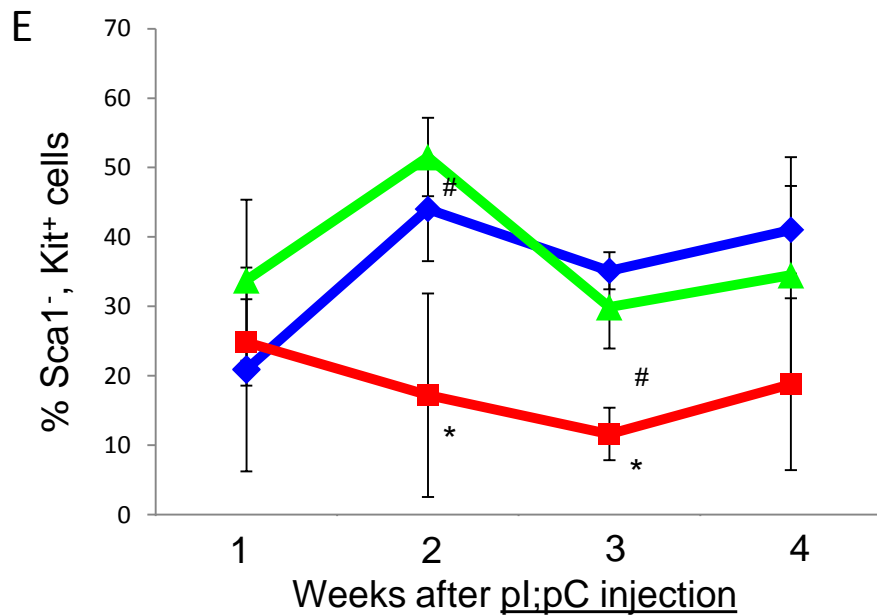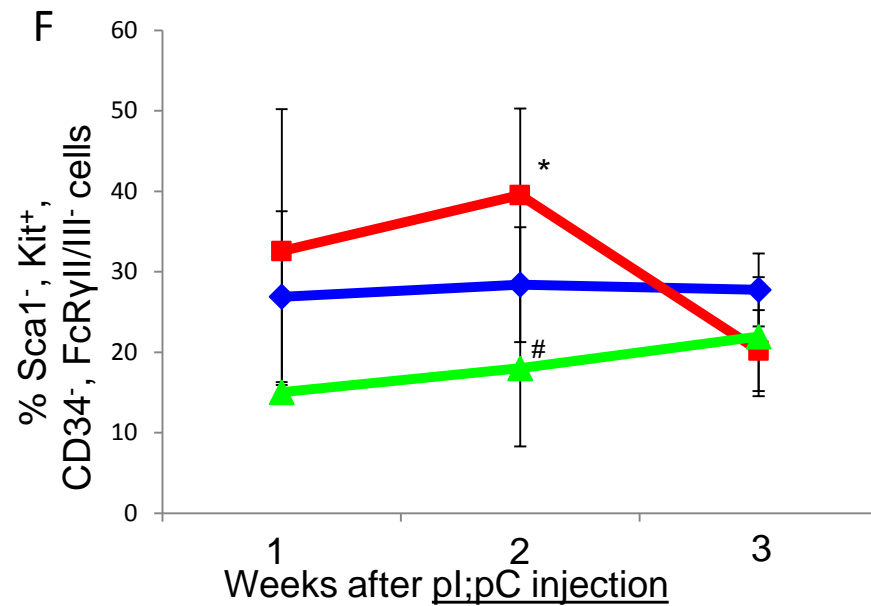

◆ *Runx1*<sup>+/+</sup>    ■ *Mx1-Cre*<sup>+</sup>, *Cbfb*<sup>+l56M</sup>, *Runx1*<sup>+/+</sup>    ▲ *Mx1-Cre*<sup>+</sup>, *Cbfb*<sup>+l56M</sup>, *Runx1*<sup>l/z</sup>

**Supplemental Figure 4. *Runx1* activity is required for adult hematopoietic defects induced by *Cbfb-MYH11*.** Line graphs of (A) the number of *lin*<sup>-</sup> cells per ml ( $\times 10^6$ ) in the bone marrow, (B) percentage (%) of BrdU<sup>+</sup> cells in the *lin*<sup>-</sup> bone marrow cell population, (C) the percentage of *Il1rl1*<sup>+</sup> cells in the *lin*<sup>-</sup> bone marrow cell population, (D) the percentage of *Csf2rb*<sup>+</sup> cells in the *lin*<sup>-</sup> bone marrow cell population, (E) the percentage of *Sca1*<sup>-</sup>, *Kit*<sup>+</sup> cells in the *lin*<sup>-</sup> bone marrow cell population, and (E) the percentage of *CD34*<sup>-</sup>, *FcRγII/III*<sup>-</sup> cells in the *Sca1*<sup>-</sup>, *Kit*<sup>+</sup>, *lin*<sup>-</sup> bone marrow cell population, in mice of the indicated genotypes, at the indicated time points after *Cbfb-MYH11* induction.  $N \geq 3$  for each genotype. \* indicates  $p \leq 0.05$  as compared to *Runx1*<sup>+/+</sup> mice. # indicates  $p \leq 0.05$  as compared to *Mx1-Cre*<sup>+</sup>, *Cbfb*<sup>+l56M</sup>, *Runx1*<sup>+/+</sup> mice.
