# Supplementary material
Source: PubMed Central journal article supplement (PMC4526349)
Supplement: NIHMS652486-supplement-5.pdf [file NIHMS652486-supplement-5.pdf]

Supplemental Figure 5

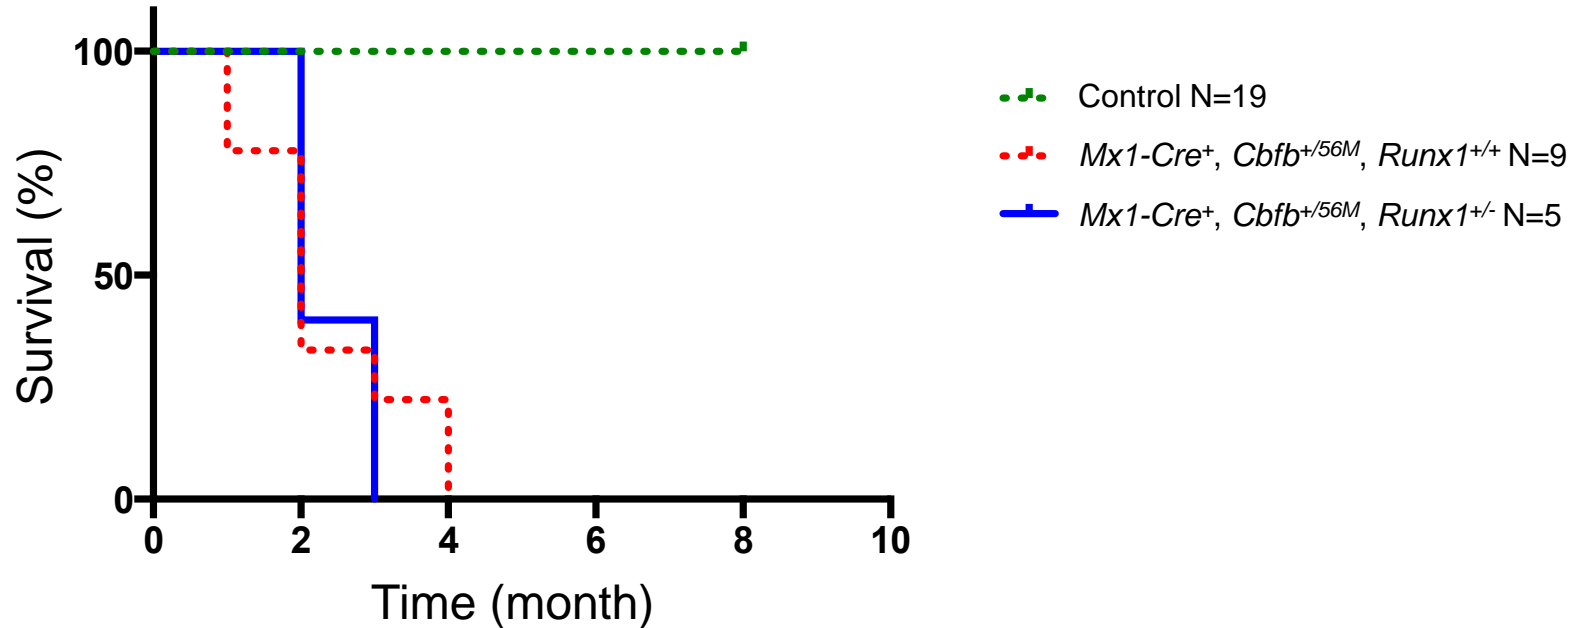

**Supplemental Figure 5. Loss of one *Runx1* allele does not delay *Cbfb-MYH11* induced leukemia.** Kaplan-Meier curve of mice with the indicated genotypes during a 10 month period of observation. Dotted green line: Control mice (N=19; including *Runx1<sup>+/+</sup>*, *Runx1<sup>+/-</sup>*, and *Cbfb<sup>+/56M</sup>*), dotted red line: *Mx1-Cre<sup>+</sup>, Cbfb<sup>+/56M</sup>, Runx1<sup>+/+</sup>* (N=9), blue line: *Mx1-Cre<sup>+</sup>, Cbfb<sup>+/56M</sup>, Runx1<sup>+/-</sup>* (N=5)
