# Supplementary material
Source: PubMed Central journal article supplement (PMC4526349)
Supplement: NIHMS652486-supplement-6.pdf [file NIHMS652486-supplement-6.pdf]

Supplemental Figure 6

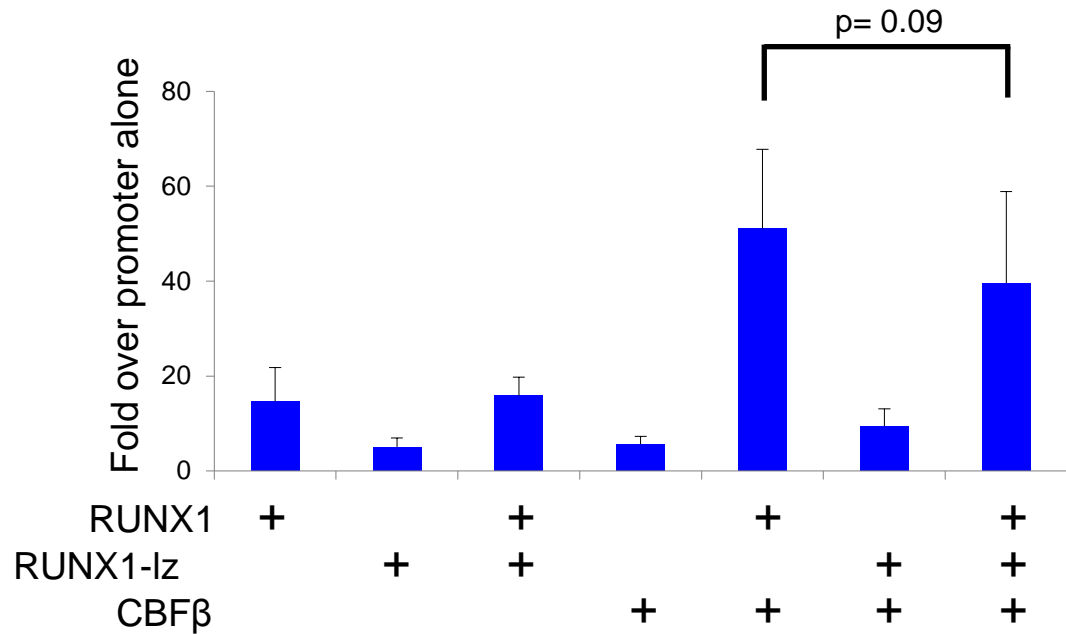

**Supplemental Figure 6. *Runx1-lz* shows a trend towards dominant repression of the MCSFR promoter.** Bar graph showing average fold change in luciferase activity relative to renilla activity in 293 cells transfected with a plasmid expressing luciferase under the control of the MCSFR promoter, a renilla control plasmid, and plasmids expressing the indicated transcription factors. Each transfection was performed in triplicate in each of 3 independent experiments. Brackets indicate the samples being compared with the associated p-values.
